# Supplementary material for: Development and use of research vignettes to collect qualitative data from healthcare professionals: a scoping review
Source: HighWire-hosted journal article supplement (doi:10.1136/bmjopen-2021-057095), 2022-01-01
Supplement: bmjopen-2021-057095supp002_data_supplement.pdf [file bmjopen-2021-057095supp002_data_supplement.pdf]

## APPENDIX 2: Search strategy

Databases searched: Academic Search Complete, CINAHL Plus, MEDLINE, PsycINFO, SocINDEX

### Search strategy for all databases searched

Search limit: Published date from 2000-01-01 to 2020-12-31

| ID | Search terms                                                                                                                                                     |
|----|------------------------------------------------------------------------------------------------------------------------------------------------------------------|
| S1 | vignette* N5 (stud* OR method* OR design OR research* OR develop*)                                                                                               |
| S2 | health*                                                                                                                                                          |
| S3 | qualitative OR “scoping review” OR “system* review”                                                                                                              |
| S4 | clinician* OR physician* OR nurs* OR “health* personnel” OR ((health* OR professional*) N2 (health* OR practice* OR regulation* OR development* OR competence*)) |
| S5 | S1 AND S2 AND S3 AND S4                                                                                                                                          |
